# Supplementary material for: Distinct Exosomal miRNA Profiles from BALF and Lung Tissue of COPD and IPF Patients
Source: MDPI journal article supplement (doi:10.3390/ijms222111830), 2021-10-31

## Supplementary Information

### **Distinct exosomal miRNA profiles from BALF and lung tissue from COPD and IPF patients**

Gagandeep Kaur<sup>1</sup>, Krishna Prahlad Maremanda<sup>1</sup>, Michael Campos<sup>2</sup>, Hitendra S Chand<sup>3</sup>, Feng Li<sup>4</sup>, Nikhil Hirani<sup>4</sup>, M.A. Haseeb<sup>5</sup>, Dongmei Li<sup>6</sup>, and Irfan Rahman<sup>1\*</sup>

#### Supplementary Tables

##### Supplementary Table S1: Significant Differentially expressed miRNAs in BALF exosomes. derived

| miRNA             | log2foldchange | logCPM   | pvalue     | FDR     | Functional Annotation                                                                                                         |
|-------------------|----------------|----------|------------|---------|-------------------------------------------------------------------------------------------------------------------------------|
| <b>NS vs COPD</b> |                |          |            |         |                                                                                                                               |
| hsa-miR-423-5p    | -3.389204282   | 14.75498 | 0.00013369 | 0.0066  | mRNA binding involved in posttranscriptional gene silencing. Role in apoptosis and cell proliferation                         |
| hsa-miR-320b      | 2.638473041    | 14.15853 | 0.00098978 | 0.01815 | tumor suppressing role by targeting CDK6                                                                                      |
| hsa-miR-22-3p     | 2.508785494    | 18.34373 | 0.00023988 | 0.0066  | negative regulator of endothelial cell proliferation and necroptotic process; but positive regulator of inflammatory response |
| <b>Sm vs COPD</b> |                |          |            |         |                                                                                                                               |
| hsa-miR-100-5p    | -3.492285687   | 18.86802 | 3.29E-05   | 0.00158 | negative regulation of cell differentiation and IL-8 secretion                                                                |
| <b>NS vs IPF</b>  |                |          |            |         |                                                                                                                               |
| hsa-miR-200a-3p   | -4.811568605   | 13.79069 | 7.88E-06   | 0.00014 | positive regulator of blood vessel endothelial migration, role in Endothelial-mesenchymal transition                          |
| hsa-miR-141-3p    | -4.31928888    | 11.4448  | 0.00045173 | 0.00422 | positive regulator of cell proliferation and negative regulator of leukocyte adhesion to vascular endothelial cell            |

|                 |              |          |            |          |                                                                                                                               |
|-----------------|--------------|----------|------------|----------|-------------------------------------------------------------------------------------------------------------------------------|
| hsa-miR-375-3p  | -4.255714743 | 12.47332 | 1.28E-05   | 0.00014  | RNA polymerase II binding complex; positive regulator of endothelial cell apoptotic process                                   |
| hsa-miR-423-5p  | -3.37545635  | 14.95874 | 0.00376795 | 0.02416  | mRNA binding involved in posttranscriptional gene silencing. Role in apoptosis and cell proliferation                         |
| hsa-miR-320b    | 3.186119102  | 14.24854 | 3.22E-06   | 9.03E-05 | tumor suppressing role by targeting CDK6                                                                                      |
| hsa-miR-200b-3p | -2.849476778 | 14.33963 | 1.21E-05   | 0.00014  | positive regulator of cell proliferation; negative regulator of gene expression                                               |
| hsa-miR-22-3p   | 2.817552446  | 18.23789 | 3.10E-06   | 9.03E-05 | negative regulator of endothelial cell proliferation and necroptotic process; but positive regulator of inflammatory response |
| hsa-miR-320a-3p | 1.906370214  | 14.44337 | 0.00267282 | 0.02138  | negative regulator of cell proliferation, cell migration and IL-4 biosynthetic process.                                       |
| hsa-miR-24-3p   | 1.83111351   | 12.04935 | 0.00388364 | 0.02416  | negative regulator of angiogenesis and blood vessel endothelial cell migration                                                |

**Supplementary Table S2: Significant differentially expressed miRNAs in Lung-derived exosomes.**

| miRNA             | log2foldchange | logCPM | pvalue   | FDR     | Function                                         |
|-------------------|----------------|--------|----------|---------|--------------------------------------------------|
| <b>NS vs COPD</b> |                |        |          |         |                                                  |
| hsa-miR-122-5p    | -3.081717764   | 8.0592 | 1.66E-05 | 0.00374 | cell proliferation, migration, invasion, and EMT |
| <b>Sm vs COPD</b> |                |        |          |         |                                                  |

|                  |              |         |          |          |                                                                                                           |
|------------------|--------------|---------|----------|----------|-----------------------------------------------------------------------------------------------------------|
| hsa-miR-122-5p   | -5.048802634 | 9.96494 | 1.64E-06 | 0.00033  | cell proliferation, migration, invasion, and EMT                                                          |
| <b>NS vs IPF</b> |              |         |          |          |                                                                                                           |
| hsa-miR-514a-3p  | 3.779748499  | 4.04505 | 3.15E-09 | 2.56E-07 | Tumor suppressor                                                                                          |
| hsa-miR-506-3p   | 3.146428357  | 5.6144  | 4.98E-07 | 2.43E-05 | negative regulator of cellular biosynthetic pathways and IL8 secretion                                    |
| hsa-miR-21-5p    | 2.828829977  | 15.6156 | 2.70E-11 | 6.58E-09 | negative modulator of angiogenesis; regulates extracellular matrix degradation                            |
| hsa-miR-338-5p   | -2.821754174 | 8.55174 | 2.59E-09 | 2.56E-07 | negative regulation of IL6 secretion and cell migration                                                   |
| hsa-miR-509-3p   | 2.767633188  | 5.4511  | 8.72E-05 | 0.00133  | negative regulator of cell migration, invasion and proliferation                                          |
| hsa-miR-223-3p   | 2.402273957  | 8.20475 | 1.88E-06 | 5.74E-05 | negative regulator of GTPase activity and regulated macrophage differentiation                            |
| hsa-miR-30d-5p   | -2.400812469 | 16.3117 | 8.89E-07 | 3.35E-05 | regulates gene expression and EMT                                                                         |
| hsa-miR-30d-3p   | -2.22958366  | 5.29936 | 4.73E-05 | 0.00094  | inhibitor of cell proliferation and invasion                                                              |
| hsa-miR-338-3p   | -2.204598086 | 7.29224 | 9.62E-07 | 3.35E-05 | negative regulator of cell migration and IL6 production                                                   |
| hsa-miR-30b-5p   | -1.967255645 | 12.7584 | 1.59E-05 | 0.00039  | positive regulator of TGF-beta signaling pathway, regulates lipid metabolism, association with senescence |
| hsa-miR-204-5p   | -1.904426753 | 5.64924 | 5.69E-05 | 0.00099  | negative regulation of IL6, IL1beta production and cell migration, regulates EMT                          |
| hsa-miR-122-5p   | -1.822688383 | 8.34723 | 0.00025  | 0.00299  | cell proliferation, migration, invasion, and EMT                                                          |
| hsa-miR-10b-5p   | -1.754493357 | 13.4712 | 0.00202  | 0.01452  | positive regulator of cell migration, Th17 regulator                                                      |
| hsa-miR-203a-3p  | -1.740223733 | 10.5438 | 3.65E-05 | 0.00081  | negative regulator of IL8 secretion, regulates EMT                                                        |
| hsa-miR-139-3p   | -1.692253283 | 4.65751 | 0.00088  | 0.0077   | Tumor suppressor, EMT                                                                                     |

|                 |              |         |          |          |                                                                                                                            |
|-----------------|--------------|---------|----------|----------|----------------------------------------------------------------------------------------------------------------------------|
| hsa-miR-486-5p  | -1.636372182 | 13.0762 | 0.00604  | 0.03137  | regulates gene expression and has been shown to be associated with IPF                                                     |
| hsa-miR-582-5p  | 1.590929655  | 3.94706 | 0.00196  | 0.01452  | tumor suppressor                                                                                                           |
| hsa-miR-21-3p   | 1.582268505  | 7.57847 | 0.00027  | 0.00299  | negative modulator of angiogenesis; regulates extracellular matrix degradation                                             |
| hsa-miR-379-5p  | 1.553371104  | 4.88324 | 0.00385  | 0.02409  | negative regulator of cell proliferation and positive regulator of apoptosis                                               |
| hsa-miR-132-3p  | 1.543109071  | 5.19083 | 0.00161  | 0.0128   | negative regulator of gene expression, regulates inflammation and cell proliferation                                       |
| hsa-miR-224-5p  | -1.541206326 | 9.28135 | 1.55E-05 | 0.00039  | regulates cell proliferation, migration and invasion through PIK3R3/Akt pathway                                            |
| hsa-miR-144-5p  | 1.53599799   | 5.70304 | 0.00293  | 0.01932  | negative regulator of EMT; positive regulation of mitochondrial organization                                               |
| hsa-miR-889-3p  | 1.534772448  | 4.45827 | 0.00534  | 0.02833  | regulates cell viability and invasion                                                                                      |
| hsa-miR-142-5p  | 1.514303487  | 8.17025 | 2.93E-08 | 1.79E-06 | negative regulation of IL1beta, response to TNF                                                                            |
| hsa-miR-7-5p    | 1.436816898  | 5.84014 | 0.00027  | 0.00299  | inhibits cell migration and invasion, suppresses tumor metastasis                                                          |
| hsa-miR-1-3p    | 1.398003997  | 9.02882 | 0.00059  | 0.00551  | cell proliferation and invasion                                                                                            |
| hsa-miR-424-3p  | 1.377444275  | 3.95708 | 0.00457  | 0.02718  | negative regulation of cell proliferation and invasion, negative regulation of fibroblast growth factor receptor signaling |
| hsa-miR-10a-5p  | -1.373153961 | 15.8906 | 0.00011  | 0.00157  | cell migration and endothelial growth factor signaling                                                                     |
| hsa-miR-125a-5p | -1.318243293 | 14.1273 | 0.00041  | 0.00397  | fibroblast transdifferentiation, negative regulation of IL16                                                               |
| hsa-miR-106b-5p | 1.308396822  | 4.51807 | 0.00325  | 0.02087  | regulates EMT and TGF beta signaling, negative regulator of IL8                                                            |
| hsa-miR-23b-5p  | -1.300249004 | 5.24808 | 0.00219  | 0.01524  | TGF beta signaling regulation                                                                                              |
| hsa-miR-628-3p  | -1.275911117 | 6.31838 | 0.00199  | 0.01452  | regulator of cell proliferator                                                                                             |

|                                 |              |         |             |             |                                                                                    |
|---------------------------------|--------------|---------|-------------|-------------|------------------------------------------------------------------------------------|
| hsa-miR-181d-5p                 | -1.204679475 | 6.05627 | 0.0024<br>6 | 0.0166<br>9 | inhibitor of cell proliferation and metastasis                                     |
| hsa-miR-155-5p                  | 1.199631772  | 7.4596  | 0.0016<br>3 | 0.0128      | negative regulator of cytokine secretion and regulates epithelial barrier and EMT  |
| hsa-miR-197-3p                  | -1.197907775 | 5.53844 | 0.0066<br>3 | 0.0330<br>3 | negative regulation of IL-18                                                       |
| hsa-miR-183-5p                  | 1.168387995  | 11.1446 | 4.99E-05    | 0.0009<br>4 | TGF-beta signaling, positive regulation of phagocytosis                            |
| hsa-miR-126-5p                  | -1.161697617 | 10.4425 | 0.0002<br>8 | 0.0029<br>9 | negative regulator of cell migration                                               |
| hsa-miR-423-5p                  | -1.158386165 | 11.3123 | 0.0047<br>2 | 0.0274<br>1 | negative regulator of cell invasion and migration                                  |
| hsa-miR-589-5p                  | -1.113954446 | 5.58091 | 0.0041<br>6 | 0.0254      | regulates EMT                                                                      |
| hsa-miR-30a-5p                  | -1.077861429 | 14.4068 | 0.0001<br>7 | 0.0021<br>9 | regulator of TGF-beta signaling                                                    |
| hsa-miR-144-3p                  | 1.07056553   | 7.30821 | 0.0087<br>4 | 0.0402<br>3 | negative regulator of EMT and positive regulator of mitochondrial organization     |
| hsa-miR-199a-3p hsa-miR-199b-3p | 1.068687434  | 12.3784 | 0.0001<br>7 | 0.0021<br>9 | positive regulator of endothelial cell migration, negative regulation of autophagy |
| hsa-miR-182-5p                  | 1.0640442    | 11.2871 | 7.58E-05    | 0.0012<br>3 | positive regulator of cell migration and cytokine secretion                        |
| hsa-miR-92a-3p                  | -1.061586028 | 11.5755 | 0.0048<br>6 | 0.0274<br>2 | regulates TGF-beta signalling                                                      |
| hsa-miR-126-3p                  | -1.020449014 | 12.1275 | 0.0006<br>1 | 0.0055<br>1 | role in angiogenesis and vascular homeostasis                                      |
| hsa-miR-340-5p                  | 0.968709958  | 7.35372 | 0.0049<br>4 | 0.0274<br>2 | regulates cell proliferation                                                       |
| hsa-miR-409-3p                  | 0.957771401  | 6.15189 | 0.0108<br>7 | 0.0482<br>1 | promotes tumorigenesis                                                             |
| hsa-miR-30a-3p                  | -0.932099425 | 10.06   | 0.0010<br>7 | 0.0090<br>4 | negative regulator of EMT                                                          |
| hsa-miR-146b-5p                 | 0.920971946  | 15.3479 | 0.0079<br>7 | 0.0381<br>5 | negative regulator of endothelial activation, EMT and IL17 pathway                 |
| hsa-miR-148a-3p                 | 0.903657387  | 12.9195 | 0.0003<br>6 | 0.0036<br>2 | role in tumor suppression                                                          |
| hsa-miR-342-3p                  | -0.890916332 | 9.21854 | 0.0083<br>4 | 0.0391<br>5 | regulates TGF-beta signaling                                                       |
| hsa-miR-151b                    | -0.840780828 | 7.66417 | 0.0062      | 0.0315<br>3 | represses cell migration                                                           |
| hsa-miR-103a-3p                 | 0.80597023   | 9.14838 | 0.0076<br>9 | 0.0375<br>4 | negative regulation of peptidyl-threonine                                          |

|                              |              |         |         |         |                                                      |
|------------------------------|--------------|---------|---------|---------|------------------------------------------------------|
|                              |              |         |         |         | phosphorylation, regulates glucose homeostasis       |
| hsa-miR-186-5p               | -0.734165882 | 11.605  | 0.00512 | 0.02778 | regulates collagen and EMT                           |
| hsa-miR-151a-5p hsa-miR-151b | -0.72411126  | 12.6144 | 0.00951 | 0.04297 | regulates cell proliferation, migration and invasion |

**Supplementary Table S3: Significant differentially expressed miRNAs on comparing the miRNAs derived from BALF or Lung-derived exosomes from IPF vs COPD patients.**

| miRNAs                          | log2FoldChange | pvalue    |
|---------------------------------|----------------|-----------|
| <b>BALF</b>                     |                |           |
| hsa-miR-375-3p                  | 3.699215206    | 9.33E-05  |
| <b>Lung Tissues</b>             |                |           |
| hsa-miR-10a-5p                  | 1.409527466    | 1.74E-06  |
| hsa-miR-99b-5p                  | 0.849983751    | 0.0006781 |
| hsa-miR-125a-5p                 | 1.491008563    | 7.53E-05  |
| hsa-miR-181a-5p                 | 0.64855263     | 0.0039477 |
| hsa-miR-21-5p                   | -2.735601026   | 1.21E-09  |
| hsa-miR-125b-5p                 | 0.928588863    | 0.0002024 |
| hsa-miR-23a-3p                  | 0.856645231    | 0.0034096 |
| hsa-miR-199a-3p hsa-miR-199b-3p | -0.816065829   | 0.0042361 |
| hsa-miR-151a-5p hsa-miR-151b    | 0.80742856     | 0.0024248 |
| hsa-miR-92a-3p                  | 1.120016981    | 0.0023208 |
| hsa-miR-182-5p                  | -1.034019544   | 0.0002701 |
| hsa-miR-221-5p                  | 0.751510707    | 0.0041159 |
| hsa-miR-145-5p                  | 0.792259796    | 0.0053713 |
| hsa-miR-342-3p                  | 1.28928554     | 1.01E-05  |
| hsa-miR-103a-3p                 | -0.886227511   | 0.0037171 |
| hsa-miR-224-5p                  | 1.033150905    | 0.0025444 |
| hsa-miR-338-5p                  | 2.10636214     | 2.35E-06  |
| hsa-miR-338-3p                  | 1.324111402    | 0.0046041 |
| hsa-miR-429                     | -1.35855317    | 0.0056567 |
| hsa-miR-1-3p                    | -1.341960391   | 0.000599  |
| hsa-miR-142-5p                  | -1.323394065   | 4.86E-08  |
| hsa-miR-484                     | 0.875965255    | 0.0053921 |
| hsa-miR-151b                    | 0.813176399    | 0.0020734 |
| hsa-miR-340-5p                  | -1.386800711   | 9.40E-06  |

|                                 |              |           |
|---------------------------------|--------------|-----------|
| hsa-miR-223-3p                  | -3.347367864 | 1.96E-14  |
| hsa-miR-374a-5p                 | -1.512435161 | 7.90E-05  |
| hsa-miR-1271-5p                 | 1.294527177  | 0.000127  |
| hsa-miR-374a-3p                 | -1.32118481  | 0.0002536 |
| hsa-miR-365a-3p hsa-miR-365b-3p | 1.255379081  | 0.0005726 |
| hsa-miR-181d-5p                 | 1.006691821  | 0.0032183 |
| hsa-miR-205-5p                  | -1.744538429 | 0.0032418 |
| hsa-miR-197-3p                  | 1.883112149  | 1.55E-08  |
| hsa-miR-21-3p                   | -1.491535768 | 0.0055195 |
| hsa-miR-204-5p                  | 1.232430302  | 0.0020586 |
| hsa-miR-345-5p                  | -1.251470622 | 0.0001833 |
| hsa-miR-23b-5p                  | 1.489623445  | 0.0005267 |
| hsa-miR-107                     | -0.870195285 | 0.0056404 |
| hsa-miR-32-5p                   | -1.49781331  | 0.0038593 |
| hsa-miR-139-3p                  | 1.549991658  | 0.0003531 |
| hsa-miR-24-2-5p                 | -1.705632668 | 0.0002179 |
| hsa-miR-328-3p                  | 1.448057593  | 0.0013465 |
| hsa-miR-22-5p                   | -1.413680584 | 0.003023  |
| hsa-miR-142-3p                  | -2.681623009 | 2.97E-05  |
| hsa-miR-548e-3p                 | -1.185559978 | 0.0033579 |
| hsa-miR-424-5p                  | -2.000054742 | 0.0038114 |
| hsa-miR-889-3p                  | -1.595329766 | 0.0022859 |
| hsa-miR-135b-5p                 | -1.860676506 | 0.0033555 |
| hsa-miR-381-3p                  | -1.47381252  | 0.0014309 |
| hsa-miR-3613-3p                 | 2.375696693  | 0.0035104 |
| hsa-miR-223-5p                  | -3.145005297 | 0.0001399 |
| hsa-miR-3613-5p                 | -3.686449059 | 4.50E-07  |
| hsa-miR-508-3p                  | -2.637539744 | 0.0035568 |
| hsa-miR-708-5p                  | -2.487002959 | 0.0011469 |
| hsa-miR-3130-3p                 | -3.482486124 | 0.0013965 |
| hsa-miR-31-5p                   | -3.475504137 | 2.37E-05  |
| hsa-miR-377-3p                  | -3.248729824 | 3.06E-06  |
| hsa-miR-514a-3p                 | -2.611946541 | 0.0014603 |
| hsa-miR-369-3p                  | -2.604592827 | 0.0020431 |
| hsa-miR-4732-3p                 | 4.179938703  | 0.0038075 |
| hsa-miR-449a                    | -3.994764171 | 0.0025207 |
| hsa-miR-4683                    | 4.884780183  | 1.98E-05  |
| hsa-miR-1291                    | 2.949952436  | 0.0031089 |
| hsa-miR-7977                    | 4.359794794  | 1.89E-05  |
| hsa-miR-656-3p                  | -2.054137869 | 0.0051107 |
| hsa-miR-4738-3p                 | 4.411823484  | 0.0001546 |

|                 |              |           |
|-----------------|--------------|-----------|
| hsa-miR-6892-5p | 2.760729508  | 0.0036942 |
| hsa-miR-1277-5p | -5.967010493 | 0.0010824 |

Supplementary Figures

Uncut Original Blots

Full unedited gel for Figure 1(iii)  
Exosome Markers CD9 and CD81 in BALF exosomes

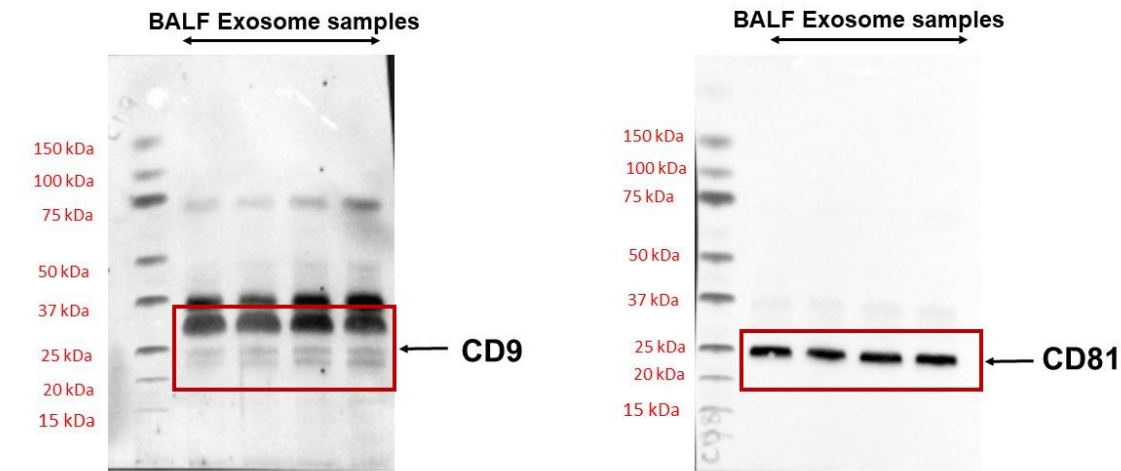

**Supplementary Figure S1:** Figure showing the original uncut blots for CD9 and CD81from BALF exosome fraction as shown in Figure 1(iii) of the manuscript.

Uncut Original Blots

Full unedited gel for Figure 2(iii)  
Exosome Markers CD63 and CD81 in Lung tissue exosomes

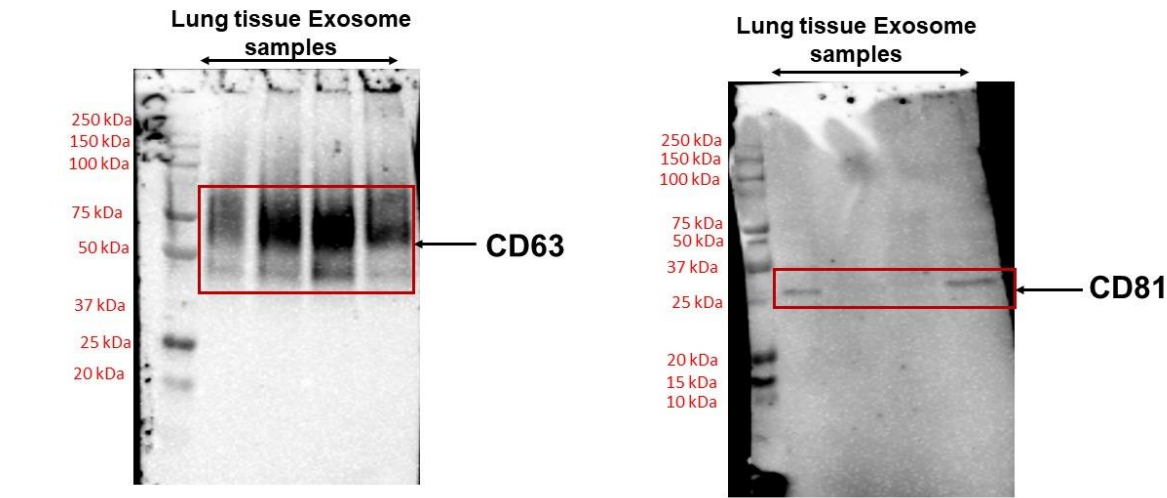



**Supplementary Figure S2:** Figure showing the original uncut blots for CD63 and CD81 from lung tissue exosome fraction as shown in Figure 2(iii) of the manuscript.

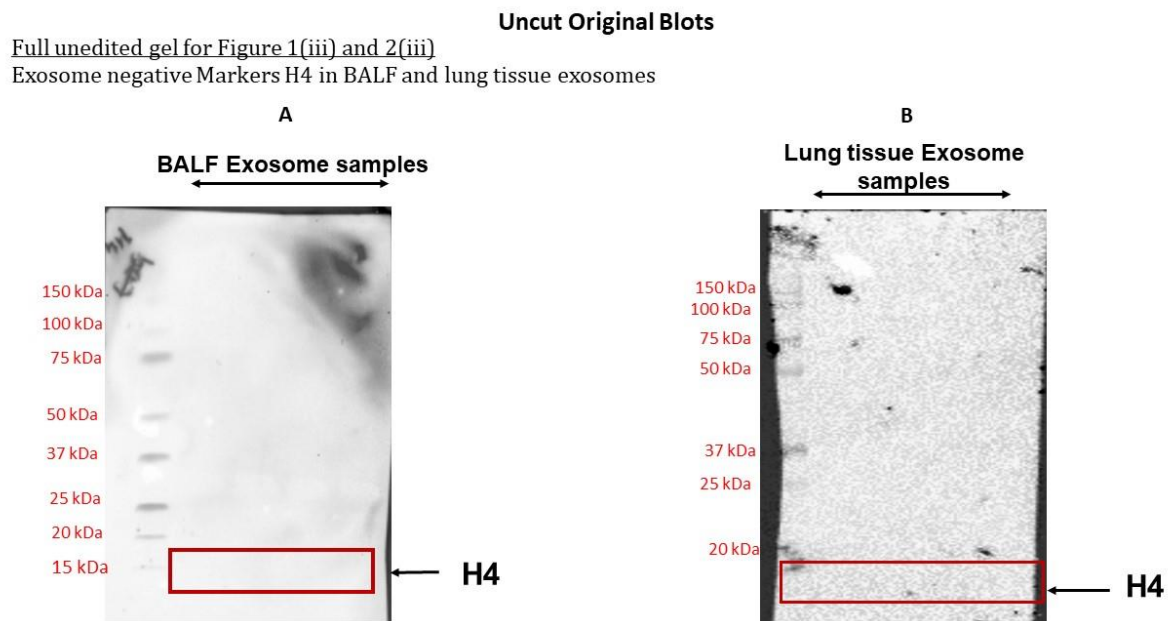

**Supplementary Figure S3:** Figure showing the original uncut blots for negative exosomal marker (H4) from (A) BALF and (B) lung tissue-derived exosome fraction as shown in Figures 1(iii) and 2(iii) respectively of the manuscript. NOTE: The blot probed for CD9 for BALF exosomes was stripped and re-probed for H4.

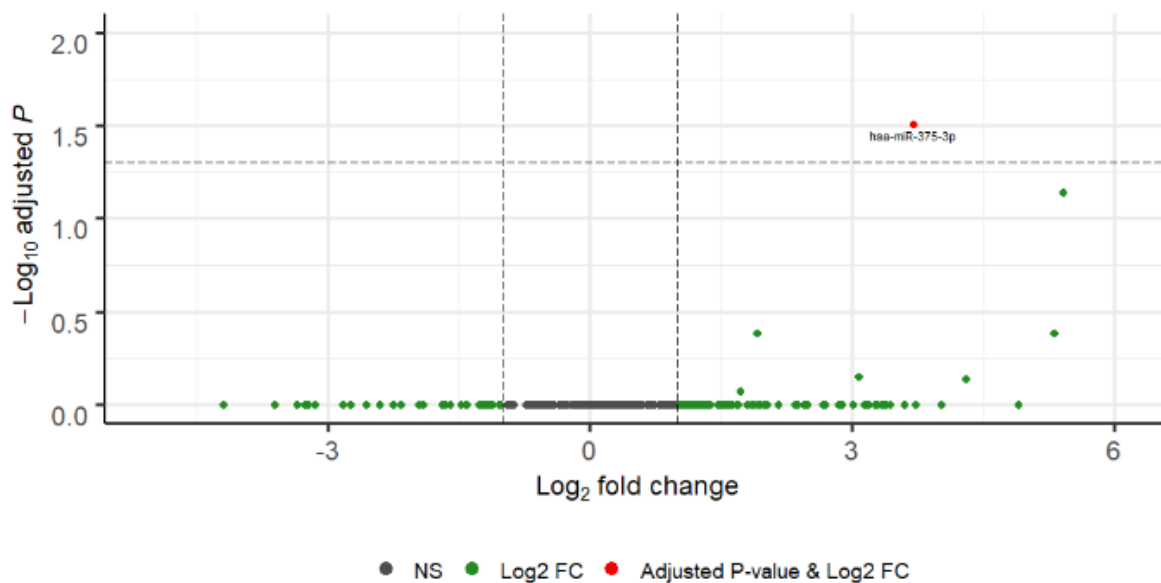

**Supplementary Figure S5:** (A) Volcano plot and (B) Heat map showing differentially expressed miRNAs amongst Lung tissue-derived exosomes from IPF vs COPD patients.

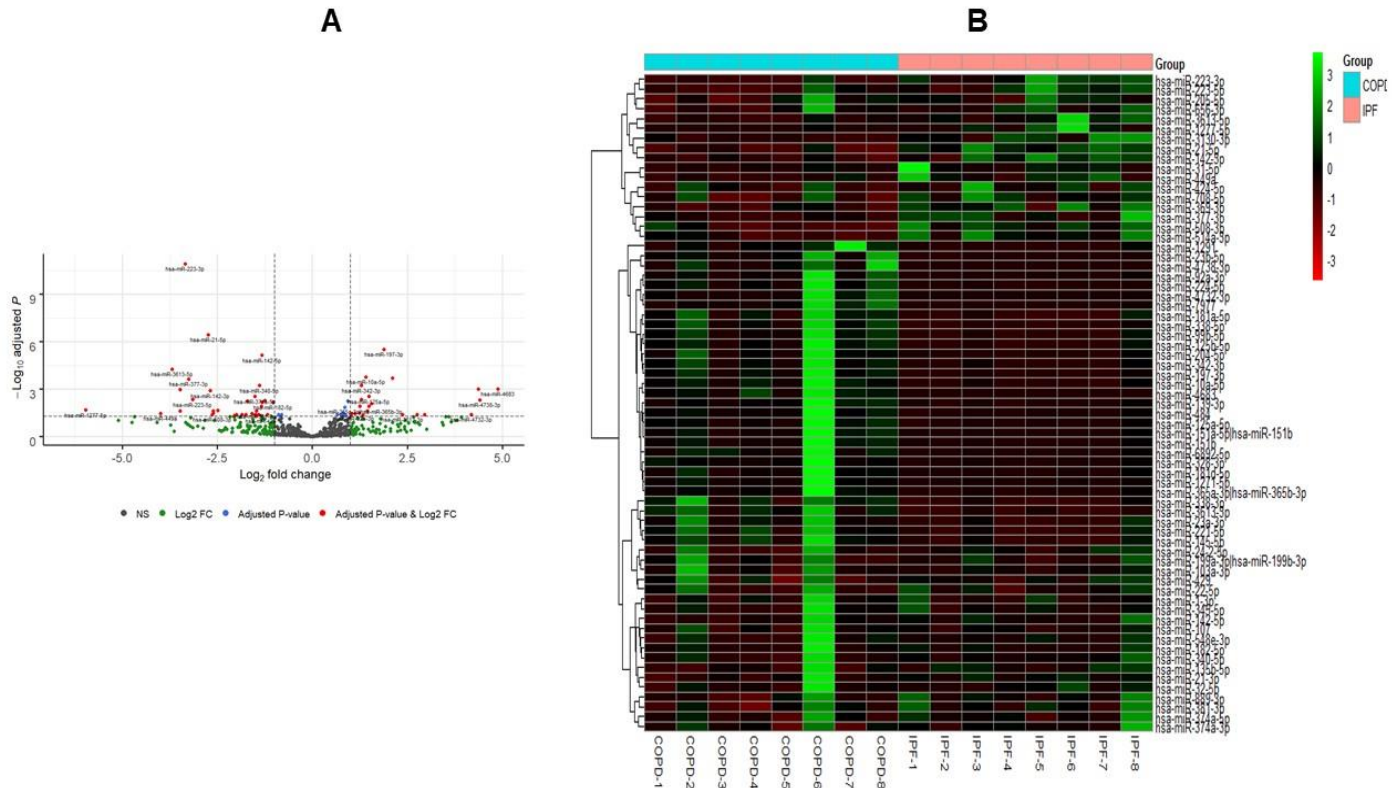

Supplement: s1 [file s1]
